# Supplementary material
Source: publisher figshare collection journal article supplement (https://tandf.figshare.com/articles/dataset/_/22791100)

# The glacial geomorphology of the Mackenzie Mountain region, Canada

Benjamin J. Stoker<sup>1</sup>, Martin Margold<sup>1</sup> and Duane Froese<sup>2</sup>

<sup>1</sup>Department of Physical Geography and Geoecology, Charles University, Prague, Czechia

<sup>2</sup>Department of Earth and Atmospheric Sciences, University of Alberta, Edmonton, Canada

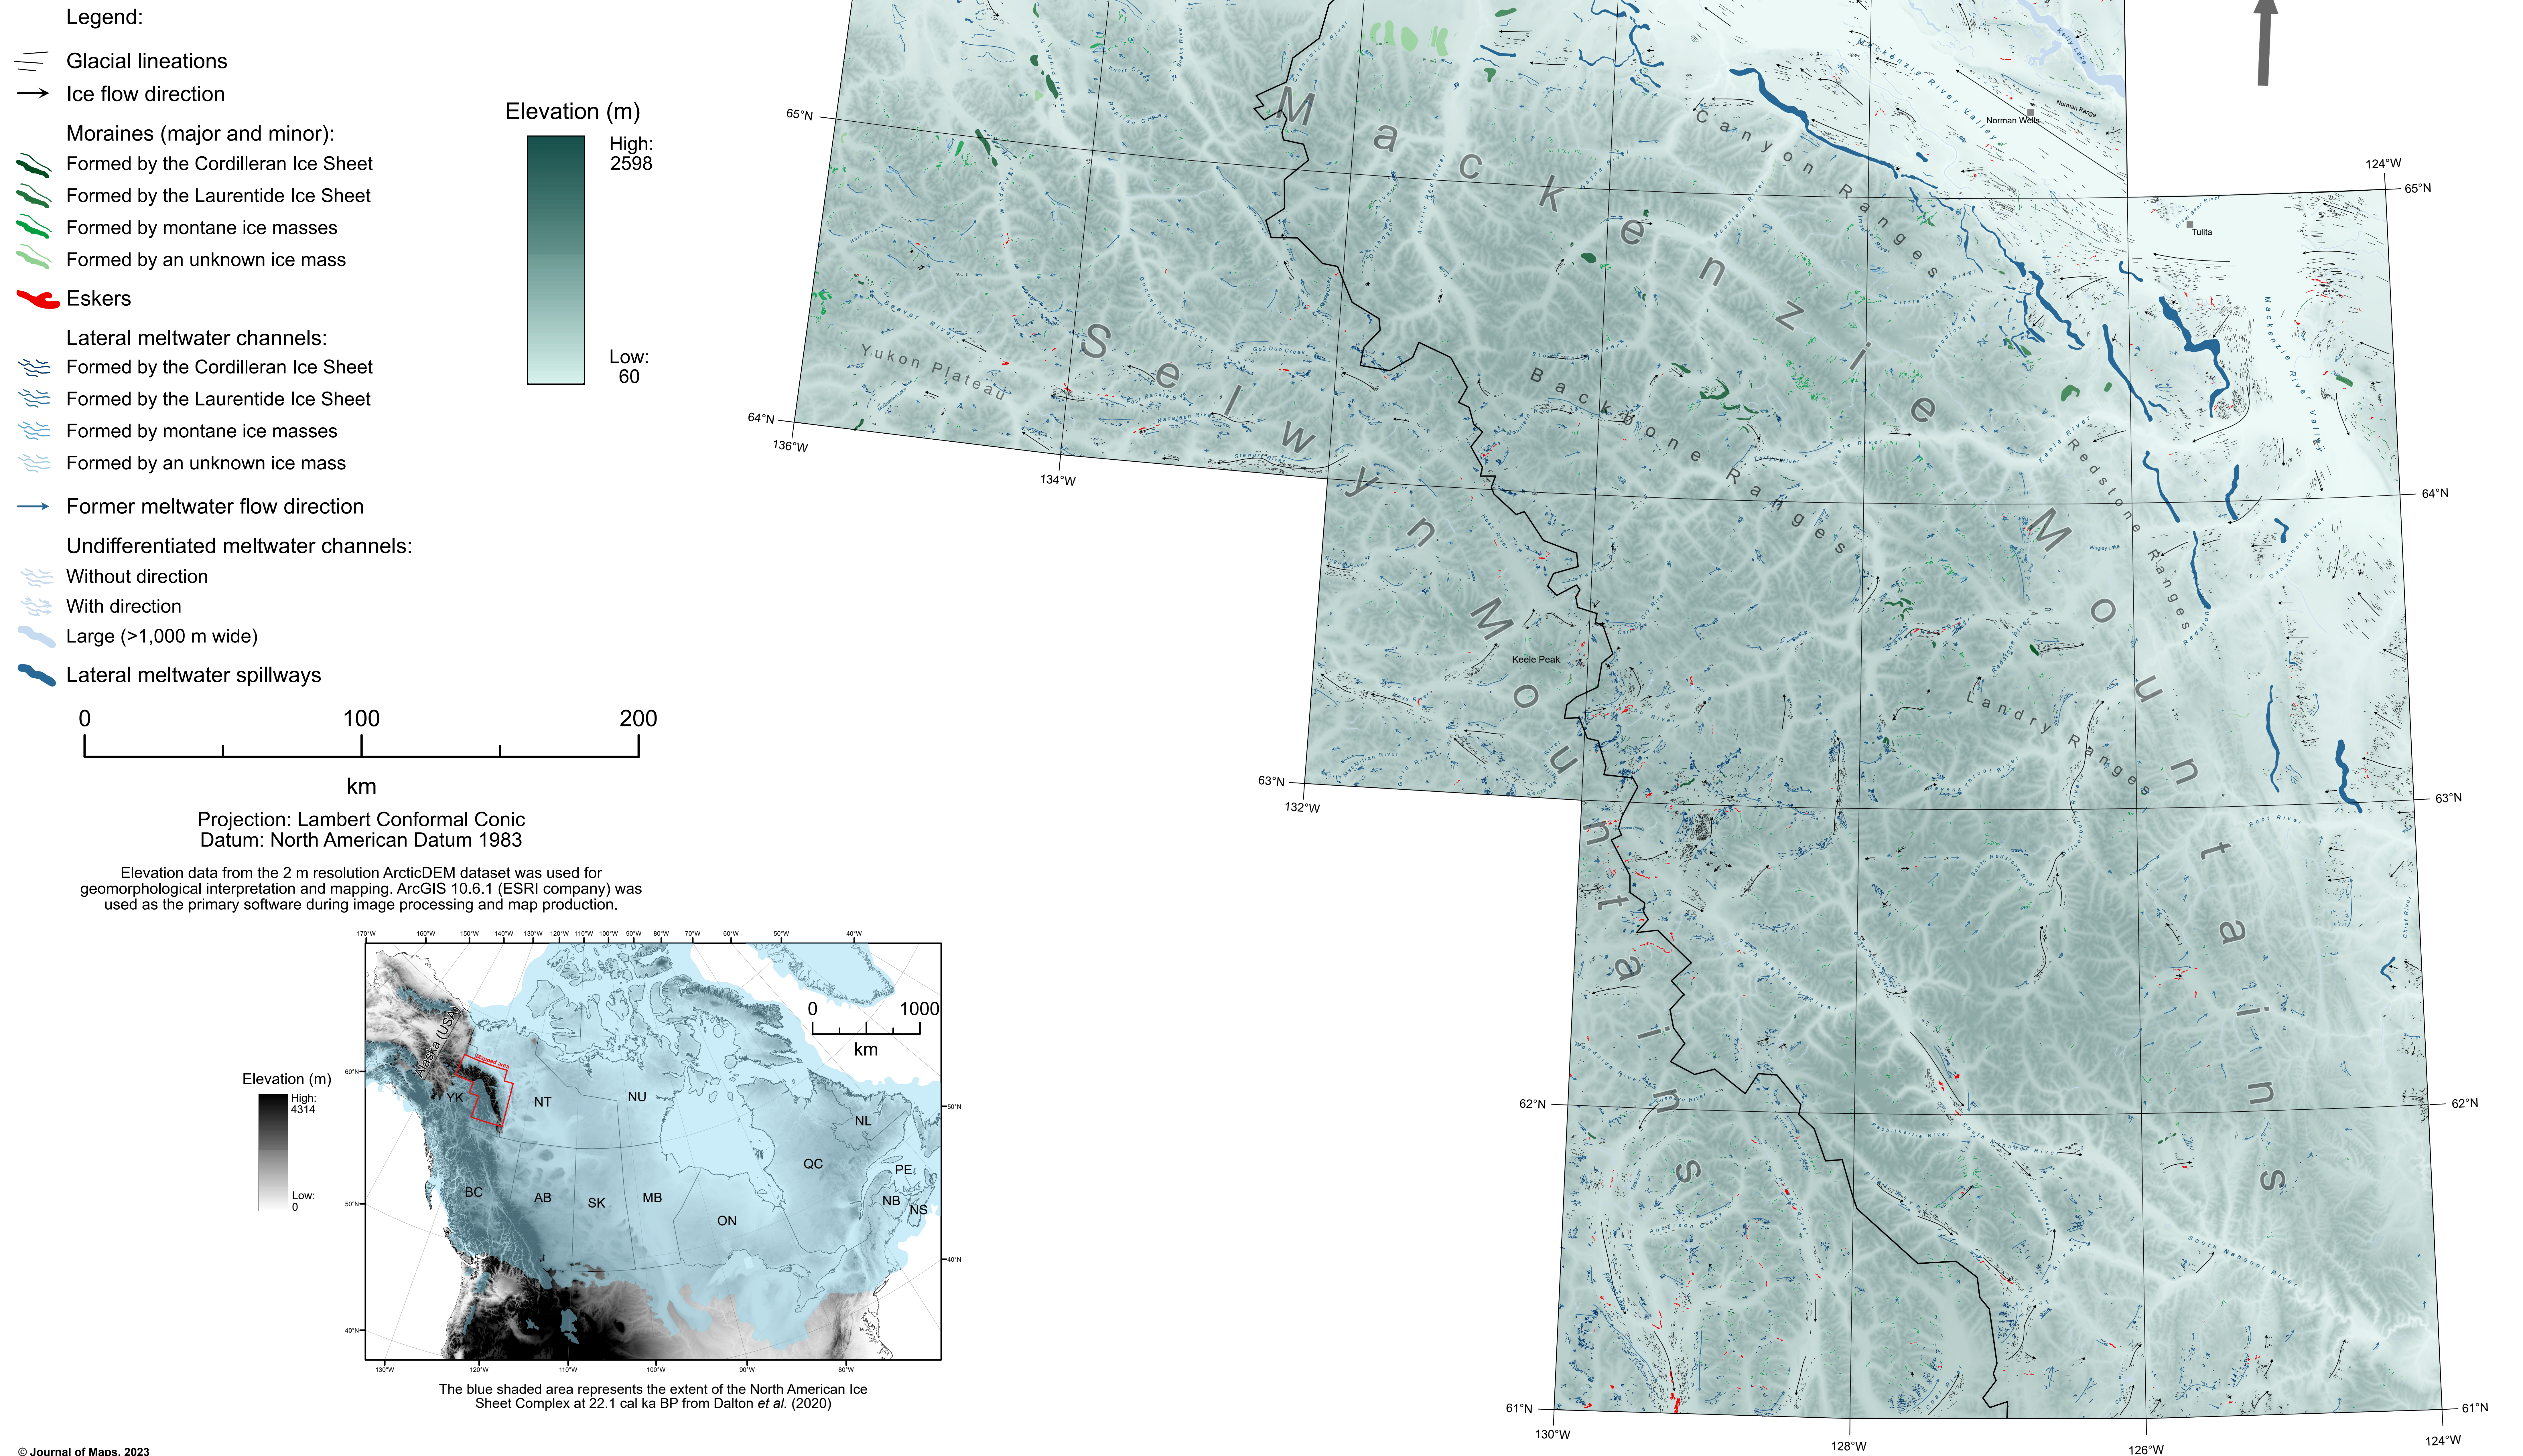

Supplement: Supplementary file 1 [file 1]
